# Supplementary material for: Synthesis, anticancer activity, and molecular simulation of N-(2,3,4,6-tetra-O-acetyl-β-d-glucopyranosyl)thioureas containing a pyrimidine ring
Source: Royal Society of Chemistry journal article supplement (doi:10.1039/d4nj00209a), 2024-01-01

**Supporting Information**

**Synthesis, anticancer activity and molecular docking simulation of *N*-(2,3,4,6-tetra-*O*-acetyl- $\beta$ -D-glucopyranosyl)thioureas containing pyrimidine ring**

Nguyen Dinh Thanh,<sup>a\*</sup> Do Son Hai,<sup>a,b</sup> Vu Ngoc Toan,<sup>a,c</sup> Nguyen Thi Kim Giang,<sup>a,b</sup> Hoang Thi Kim Van,<sup>a,d</sup> Nguyen Minh Tri,<sup>a,c</sup> Duong Ngoc Toan<sup>a,e</sup>

<sup>a</sup> Faculty of Chemistry, VNU University of Science (Vietnam National University, Ha Noi), 19 Le Thanh Tong, Hoan Kiem, Ha Noi, Viet Nam

<sup>b</sup> Institute of New Technology, Military Institute of Science and Technology, 17 Hoang Sam, Cau Giay, Ha Noi, Viet Nam

<sup>c</sup> Institute of Science and Technology, Ministry of Public Security of Vietnam, 47 Pham Van Dong, Cau Giay, Ha Noi, Viet Nam

<sup>d</sup> Faculty of Chemical Technology, Viet Tri University of Industry, Tien Kien, Lam Thao, Phu Tho, Viet Nam

<sup>e</sup> Faculty of Chemistry, Thai Nguyen University of Education, Address: 20 Luong Ngoc Quyen, Thai Nguyen, Viet Nam

## 1. Synthesis of 2-(4-methoxyphenyl)-6-(R-phenyl)-2-aminopyrimidines (5a-k)

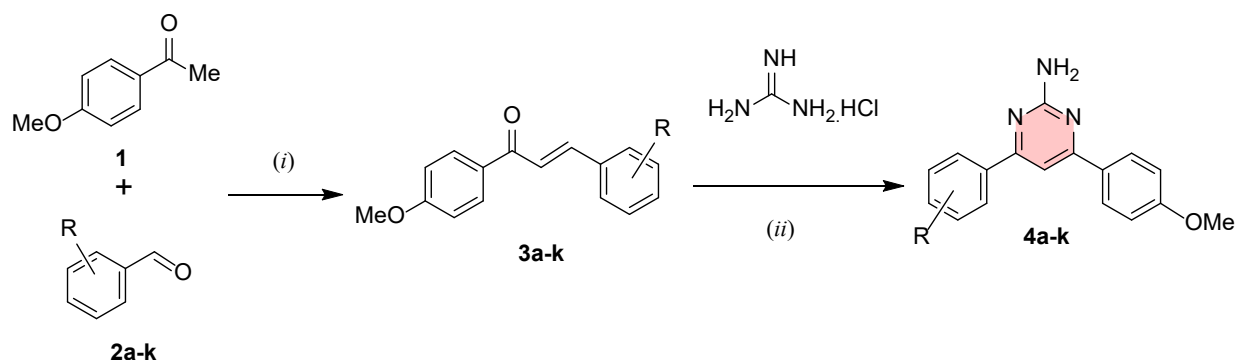

### 1.1. Synthesis of Substituted chalcones 3a-k

4-Methoxyacetophenone (1, 0.02 mol, 2.40 g) was added to a solution of appropriate substituted benzaldehyde (2a-k, 0.02 mol) in 96% ethanol (5 mL). Next, KOH solution (prepared from 0.84 g of KOH in 4 mL of water) was slowly dropped into the reaction mixture while temperature of the mixture was always kept at about 15–20°C. The reaction was stirred for 4–5 h more. The solid product filtered and washed thoroughly with water to neutral. The raw product of yellow or light-yellow colour was obtained. After crystallization from 96% ethanol or solvent mixture of ethanol-toluene (1:1 in volume) appropriate  $\alpha,\beta$ -unsaturated ketone was obtained as needle crystals.

#### 3-(4-Methoxyphenyl)-1-phenylprop-2-en-1-one (3a)

From 4-methoxybenzaldehyde 2a (2.72 g). M.p.: 61–62°C (from 96% ethanol). Yield: 3.76 (79%).

#### 3-(4-Fluorophenyl)-1-(4-methoxyphenyl)prop-2-en-1-one (3b)

From 4-fluorobenzaldehyde 2b (2.48 g). M.p.: 90–91°C (from 96% ethanol). Yield: 3.62 g (80%).

#### 3-(4-Chlorophenyl)-1-(4-methoxyphenyl)prop-2-en-1-one (3c)

From 4-chlorobenzaldehyde (2.81 g). M.p.: 142–143°C (from 96% ethanol). Yield: 4.02 g (83%).

#### 3-(3-Chlorophenyl)-1-(4-methoxyphenyl)prop-2-en-1-one (3d)

From 3-chlorobenzaldehyde (2.81 g). M.p.: 127–128°C (from 96% ethanol). Yield: 3.93 g (81%).

#### 3-(2-Chlorophenyl)-1-(4-methoxyphenyl)prop-2-en-1-one (3e)

From 2-chlorobenzaldehyde (2.81 g). M.p.: 133–134°C (from 96% ethanol). Yield: 3.59 g (74%).

**3-(4-Bromophenyl)-1-(4-methoxyphenyl)prop-2-en-1-one (3f)**

From bromobenzaldehyde (3.70 g). M.p.: 154–155°C (from 96% ethanol). Yield: 4.48 g (78%).

**1-(4-Methoxyphenyl)-3-(4-methylphenyl)prop-2-en-1-one (3g)**

From 4-methylbenzaldehyde (2.40 g). M.p.: 99–100°C (from 96% ethanol-toluene, 1:1 in volume). Yield: 4.03 g (80%).

**1-(4-Methoxyphenyl)-3-[4-(propan-2-yl)phenyl]prop-2-en-1-one (3h)**

From 4-isopropylbenzaldehyde (2.96 g). M.p.: 72–73°C (from 96% ethanol-toluene, 1:1 in volume). Yield: 4.20 g (75%).

**1,3-Bis(4-methoxyphenyl)prop-2-en-1-one (3i)**

From 4-methoxybenzaldehyde (2.72 g). M.p.: 154–155°C (from 96% ethanol-toluene, 1:1 in volume). Yield: 4.13 g (77%).

**3-(3-Methoxyphenyl)-1-(4-methoxyphenyl)prop-2-en-1-one (3j)**

From 3-methoxybenzaldehyde (2.72 g). M.p.: 111–112°C (from 96% ethanol-toluene, 1:1 in volume). Yield: 4.02 g (75%).

**3-[4-(Dimethylamino)phenyl]-1-(4-methoxyphenyl)prop-2-en-1-one (3k)**

From 4-dimethylaminobenzaldehyde (2.98 g). M.p.: 124–124°C (from 96% ethanol-toluene, 1:1 in volume). Yield: 4.61 g (82%).

**1.2. Synthesis of 2-(4-methoxyphenyl)-6-(R-phenyl)-2-aminopyrimidines (5a-k)**

Substituted chalcones **3a-k** were prepared by reaction between 4-methoxyacetophenone (**1**) and the corresponding substituted benzaldehydes (**2a-k**) according to literature procedure.<sup>1, 2</sup> Appropriate chalcone (0.005 mol) was dissolved in 96% ethanol (20 mL) then guanidine hydrochloride (0.0075 mol, 0.7 g) and solid NaOH (0.0225 mol, 0.9 g) were added to this solution. The reaction mixture was heated under reflux for 10–14 h. The solvent was removed under reduced pressure and cool for 3–4 hours. The separated product as a solid was filtered washed with water to a neutral reaction. Recrystallization from ethanol/toluene mixture (1:1 by volume) to afford the titled 2-(4-bromophenyl)-6-(R-phenyl)-2-aminopyrimidines (**5a-k**).<sup>3</sup>

**2-Amino-4-phenyl-6-(4-methoxyphenyl)pyrimidine (5a)**

From benzylidene-(4-methoxyacetophenone **3a** (0.005 mol, 1.19 g). M.p.: 151–152°C. Yield: 0.93 g (67%).

**2-Amino-4-(4-methoxyphenyl)-6-(4-fluorophenyl)pyrimidine (5b)**

From (4-fluorobenzylidene)-4-methoxyacetophenone **3b** (0.005 mol, 1.34 g). M.p.: 189–190°C. Yield: 0.96 g (65%).

**2-Amino-4-(4-methoxyphenyl)-6-(4-chlorophenyl)pyrimidine (5c)**

From (4-chlorobenzyliden)-4-methoxyacetophenone **3c** (0.005 mol, 1.36 g). M.p.: 156–157°C. Yield: 1.06 g (75%).

**2-Amino-4-(4-methoxyphenyl)-6-(3-chlorophenyl)pyrimidine (5d)**

From (3-chlorobenzyliden)-4-methoxyacetophenone **3d** (0.005 mol, 1.36 g). M.p.: 130–131°C. Yield: 1.04 g (74%).

**2-Amino-4-(4-methoxyphenyl)-6-(2-chlorophenyl)pyrimidine (5e)**

From (2-chlorobenzyliden)-4-methoxyacetophenone **3e** (0.005 mol, 1.36 g). M.p.: 161–162°C. Yield: 0.77 g (55%).

**2-Amino-4-(4-methoxyphenyl)-6-(4-bromophenyl)pyrimidine (5f)**

From (4-bromobenzyliden)-4-methoxyacetophenone **3f** (0.005 mol, 1.59 g). M.p.: 170–171°C. Yield: 1.35 g (76%).

**2-Amino-4-(4-methoxyphenyl)-6-(4-methylphenyl)pyrimidine (5g)**

From (4-methylbenzyliden)-4-methoxyacetophenone **3g** (0.005 mol, 1.26 g). M.p.: 125–126°C. Yield: 1.00 g (68%).

**2-Amino-4-(4-methoxyphenyl)-6-(4-isopropylphenyl)pyrimidine (5h)**

From (4-isopropylbenzyliden)-4-methoxyacetophenone **3h** (0.005 mol, 1.40 g). M.p.: 126–127°C. Yield: 1.13 g (71%).

**2-Amino-4,6-bis(4-methoxyphenyl)pyrimidine (5i)**

From 1,3-bis(4-methoxyphenyl)prop-2-en-1-one **3i** (0.005 mol, 1.23 g). M.p.: 179–180°C. Yield: 1.23 g (80%).

**2-Amino-4-(4-methoxyphenyl)-6-(3-methoxyphenyl)pyrimidine (5j)**

From (3-methoxybenzyliden)-4-methoxyacetophenone **3j** (0.005 mol, 1.23 g). M.p.: 140–141°C. Yield: 1.21 g (79%).

**2-Amino-4-(4-methoxyphenyl)-6-(4-dimethylaminophenyl)pyrimidine (5k)**

From (4-dimethylaminobenzyliden)-4-methoxyacetophenone **3k** (0.005 mol, 1.41 g). M.p.: 175–176°C. Yield: 1.25 g (78%).

**2. Synthesis of *N*-(2,3,4,6-tetra-*O*-acetyl- $\beta$ -D-glucopyranosyl isothiocyanate**

*N*-(2,3,4,6-Tetra-*O*-acetyl- $\beta$ -D-glucopyranosyl isothiocyanate **6** was prepared from D-glucose **5** through bromide derivative according to literature procedures.<sup>4,5</sup>

**References**

1. M. C. Almeida, D. I. S. P. Resende, P. M. da Costa, M. M. M. Pinto and E. Sousa, *European Journal of Medicinal Chemistry*, 2021, **209**, 112945.
2. E. V. Filho, E. M. C. Pinheiro, S. Pinheiro and S. J. Greco, *Tetrahedron*, 2021, **92**, 132256.

3. N. F. Nadur, L. L. de Azevedo, L. Caruso, C. S. Graebin, R. B. Lacerda and A. E. Kümmerle, *European Journal of Medicinal Chemistry*, 2021, **212**, 113123.
4. A. Tashpulatov, V. Afanas' ev, M. Y. Lidak, N. Sukhova, Y. Y. Popelis and I. Rakhmatullaev, *Chemistry of Heterocyclic Compounds*, 1983, **19**, 137-141.

### 3. Molecular docking study

(A) Ligand **7c** (R = 4-Cl)

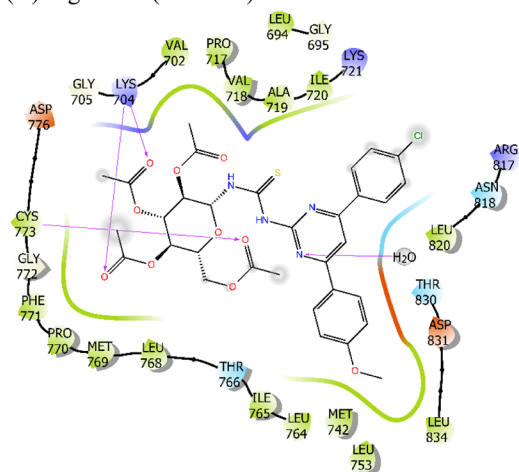

(B) Ligand **7h** (R = 4-iPr)

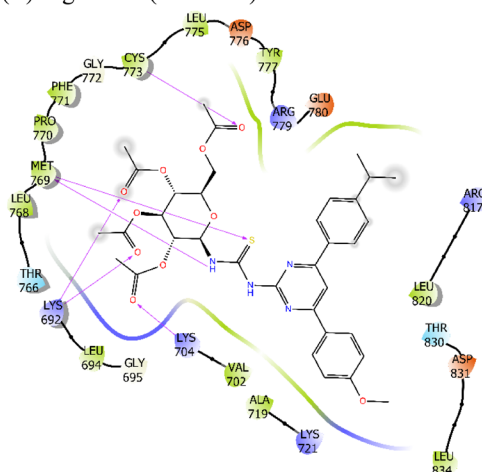

(C) Ligand **7i** (R = 4-OMe)

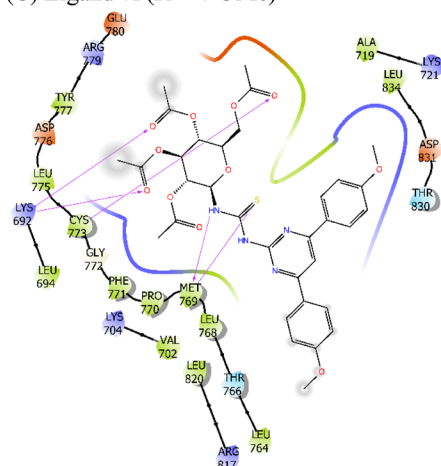

(D) Ligand **7k** (R = 4-NMe<sub>2</sub>)

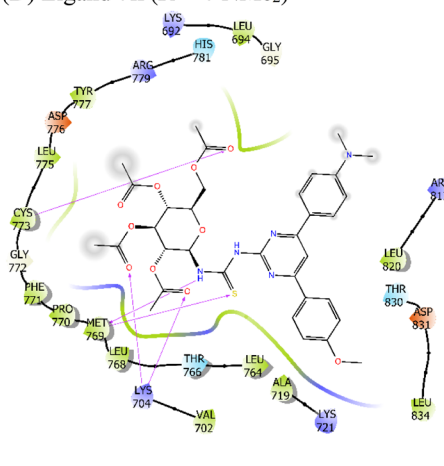

(E) Erlotinib

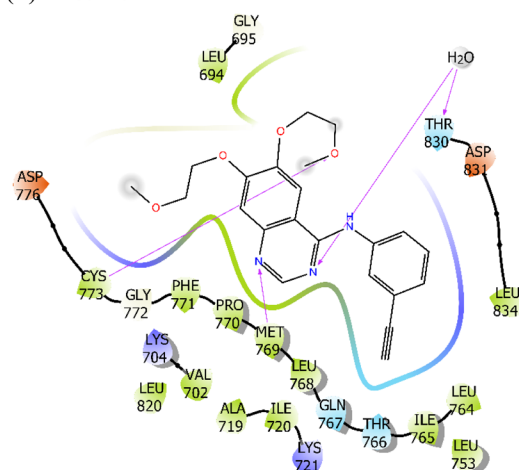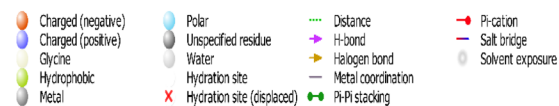

**Figure 1S.** The mode of interaction in the 2D-presentation of ligands **7c** (A), **7h** (B), **7i** (C), **7k** (D), and cocrystal erlotinib (E) in the active pocket on enzyme 4HJO indicated the H bonds and lipophilic interactions of each ligand corresponding to the residues.

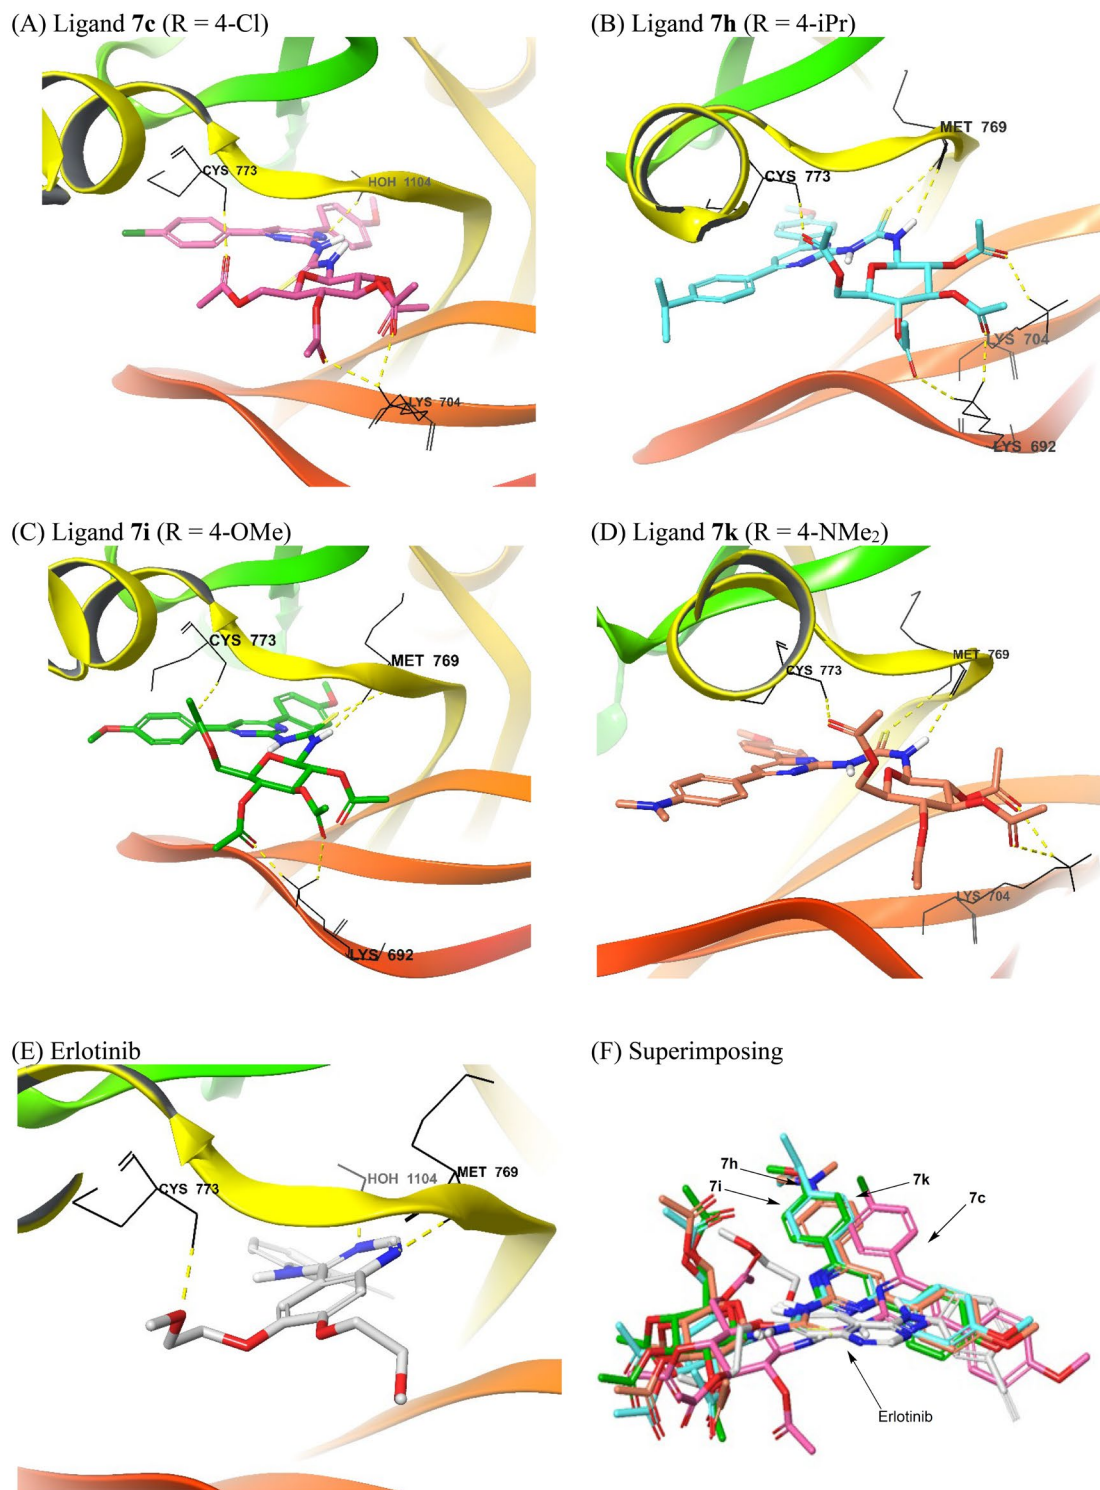

**FIGURE 2S** The mode of interaction in the 3D-presentation of ligands **7c** (A), **7h** (B), **7i** (C), **7k** (D), and cocrystal erlotinib (E) in the active pocket on enzyme 4HJO indicated the H bonds and lipophilic interactions of each ligand corresponding to the residues. (F) The superimposed positions of selected ligands **7c** (in magenta color), **7h** (in cyan color), **7i**, (in green color) and **7k** (in orange color) with erlotinib (in grey color) in active site of 4HJO.

### 3. NMR & MS Spectra

#### *NMR & MS Spectra of N-(2,3,4,6-tetra-O-acetyl-β-D-glucopyranosyl)-N-[4-phenyl-6-(4-methoxyphenyl)pyrimidine-2'-yl]thiourea (7a)*

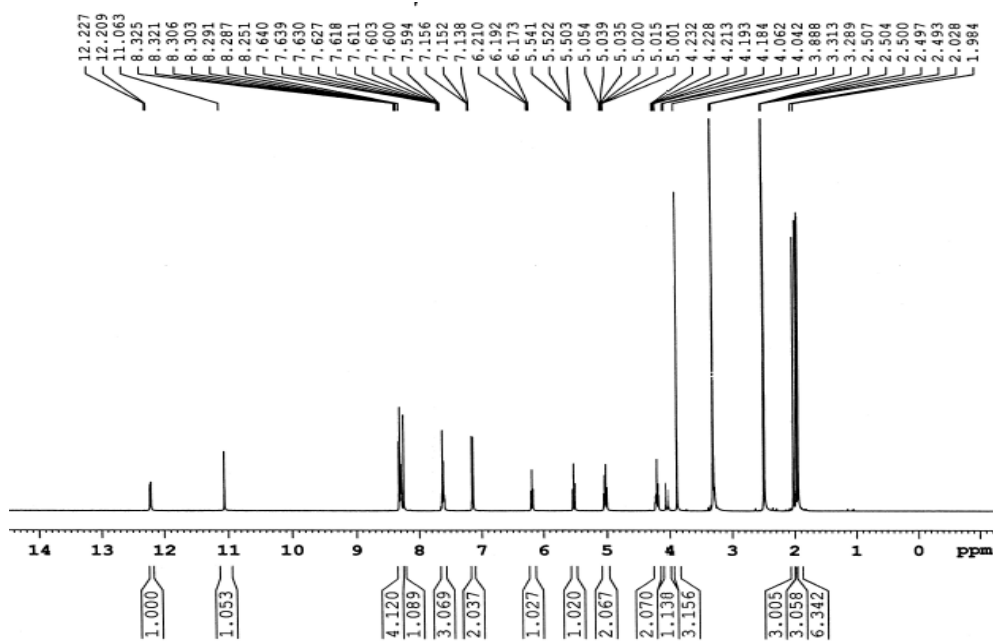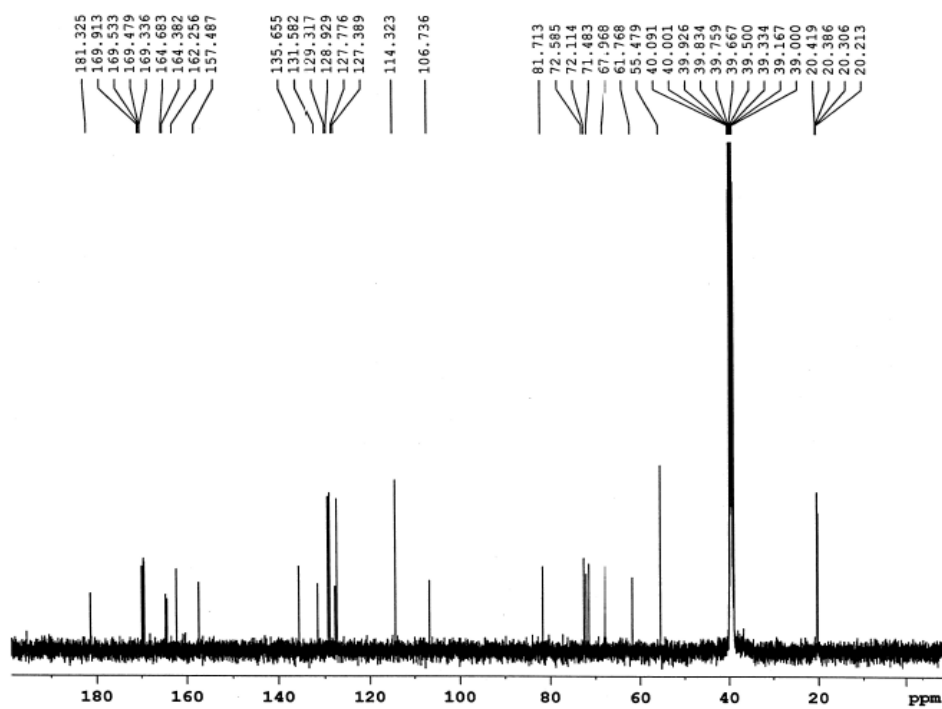



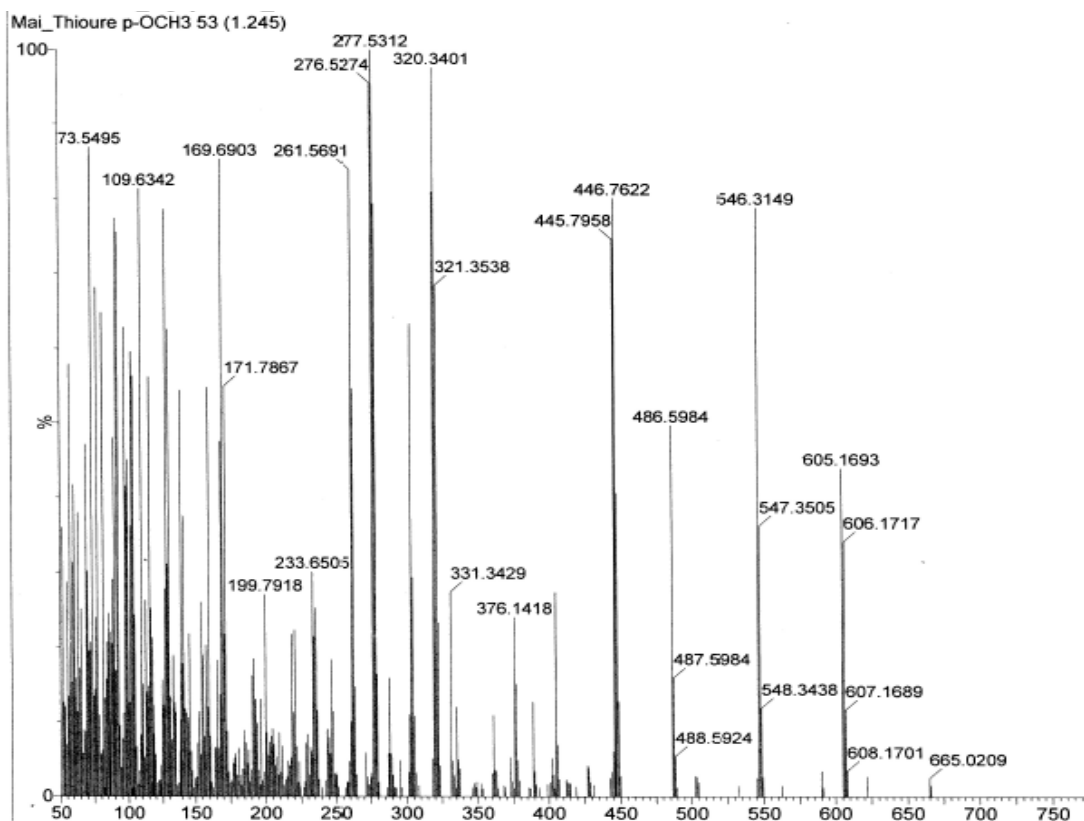

*NMR & MS Spectra of N-(2,3,4,6-tetra-O-acetyl-β-D-glucopyranosyl)-N-[4-(4-fluorophenyl)-6-(4-methoxyphenyl)pyrimidine-2-yl]thiourea (7b)*

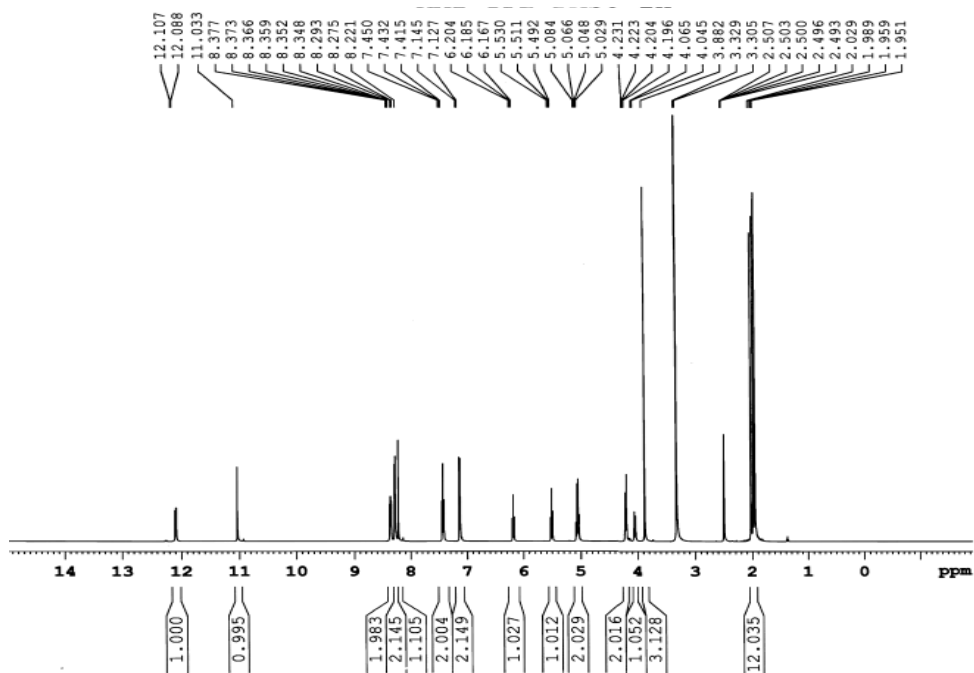

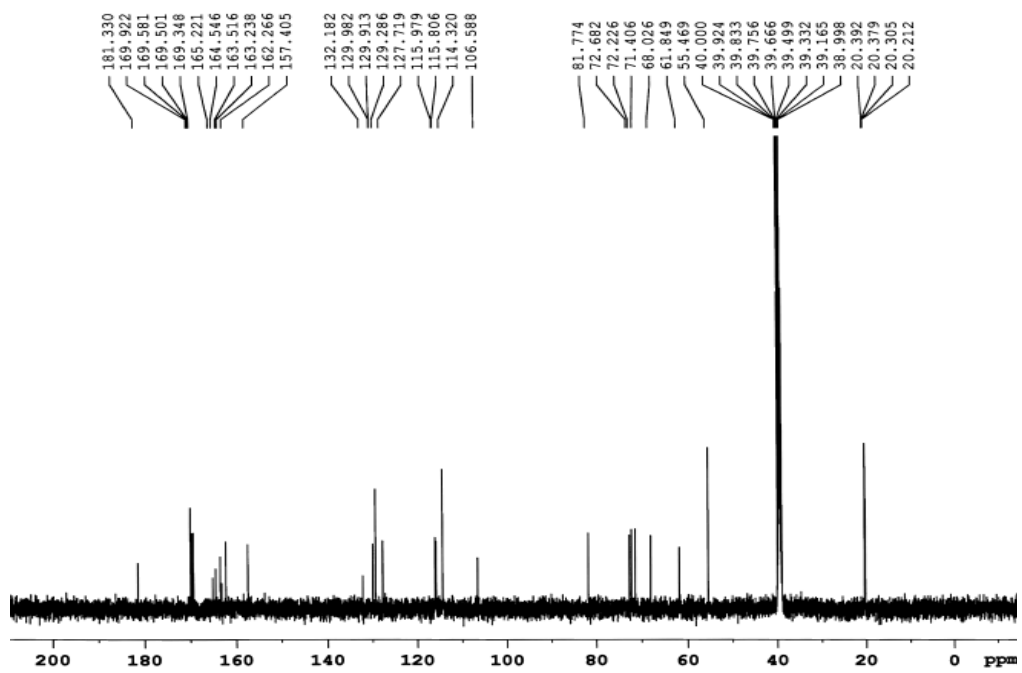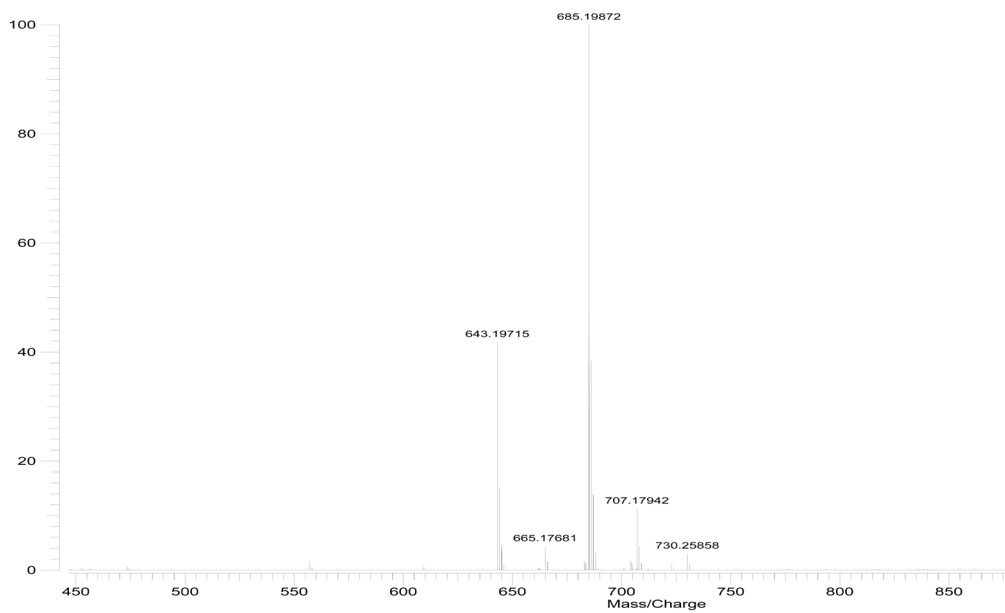

***N*-(2,3,4,6-tetra-*O*-acetyl- $\beta$ -D-glucopyranosyl)-*N*-[4-(4-chlorophenyl)-6-(4-methoxyphenyl)pyrimidine-2-yl]thiourea (7c)**

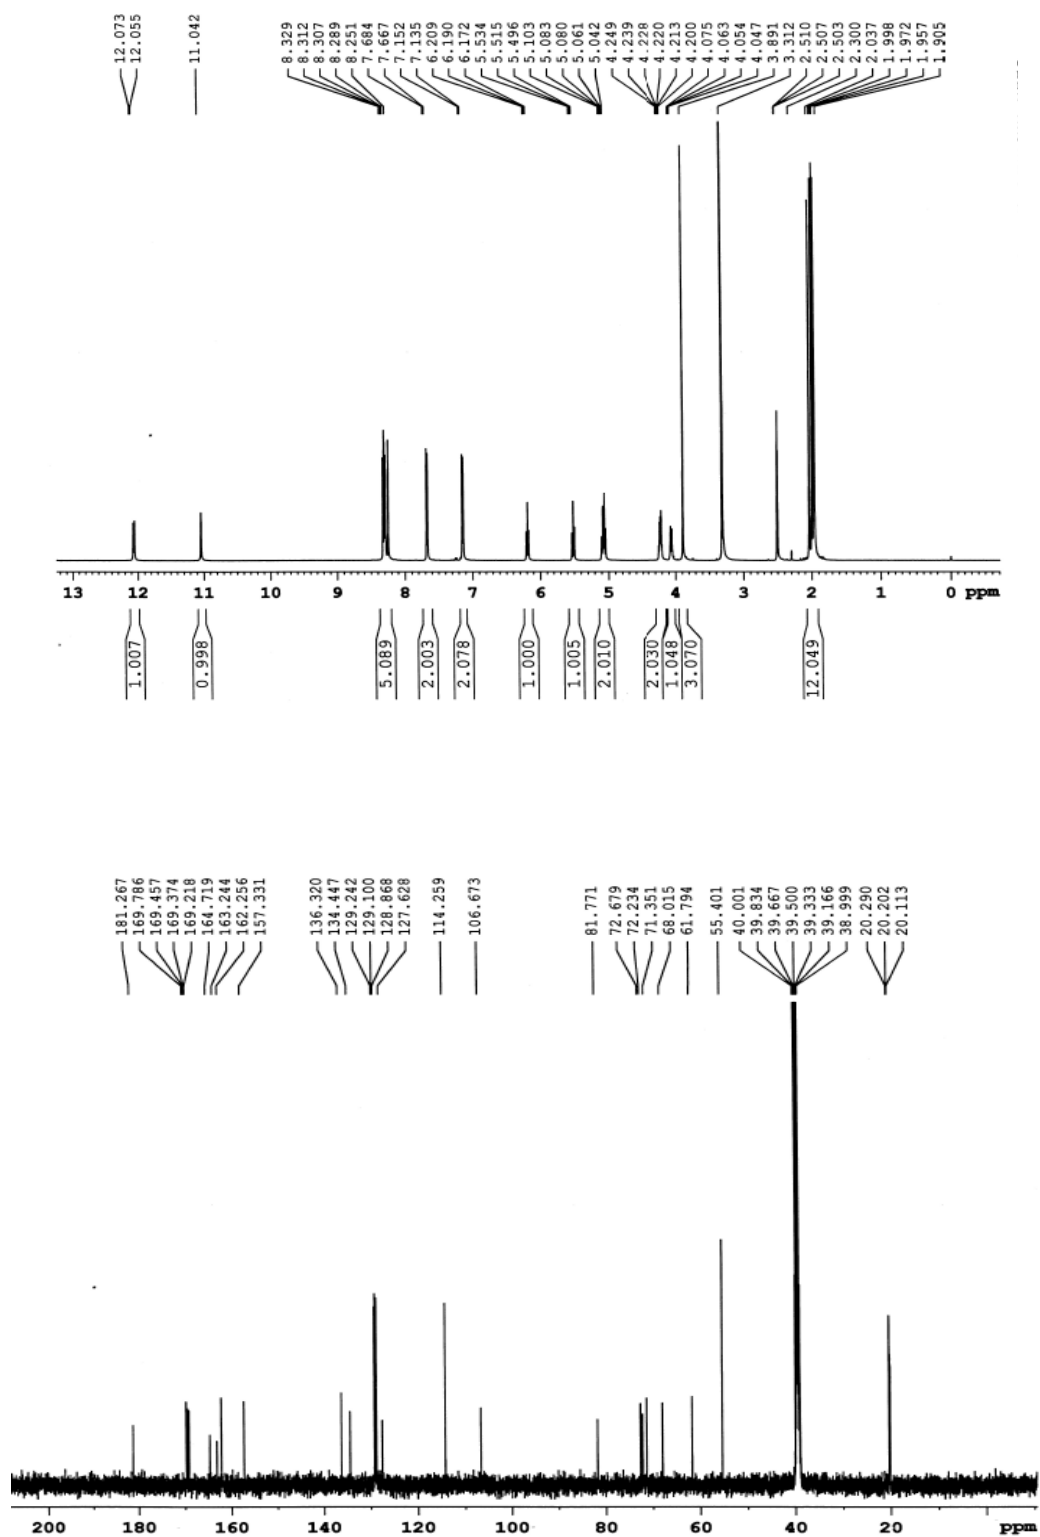

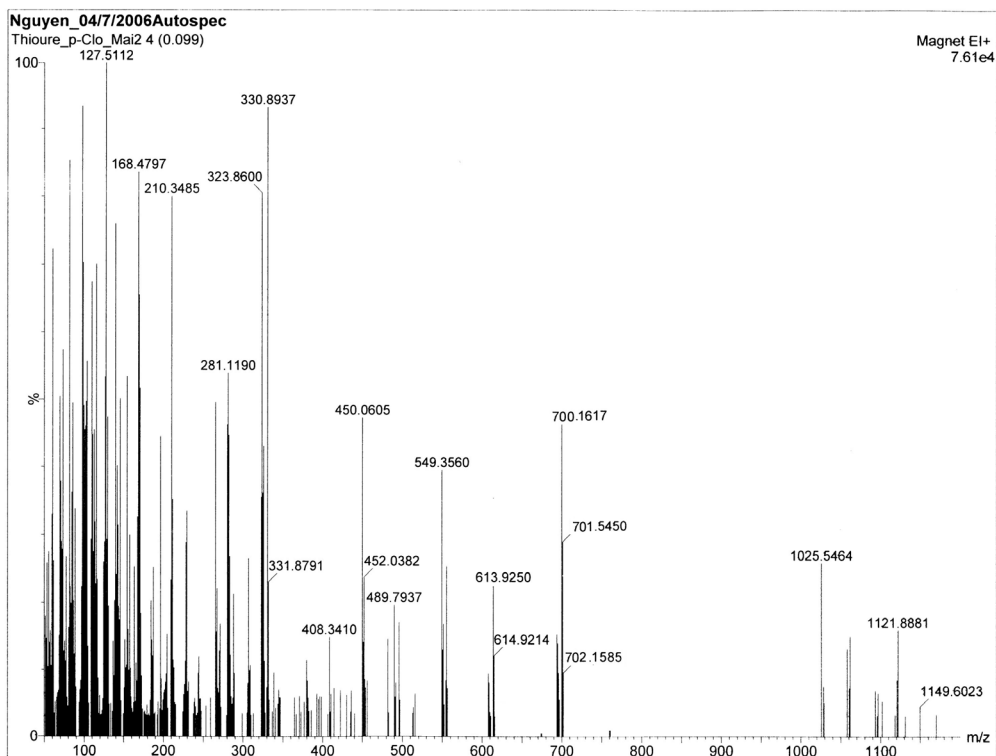

***NMR & MS Spectra of N-(2,3,4,6-tetra-O-acetyl-β-D-glucopyranosyl)-N-[4-(3-chlorophenyl)-6-(4-methoxyphenyl)pyrimidine-2-yl]thiourea (7d)***

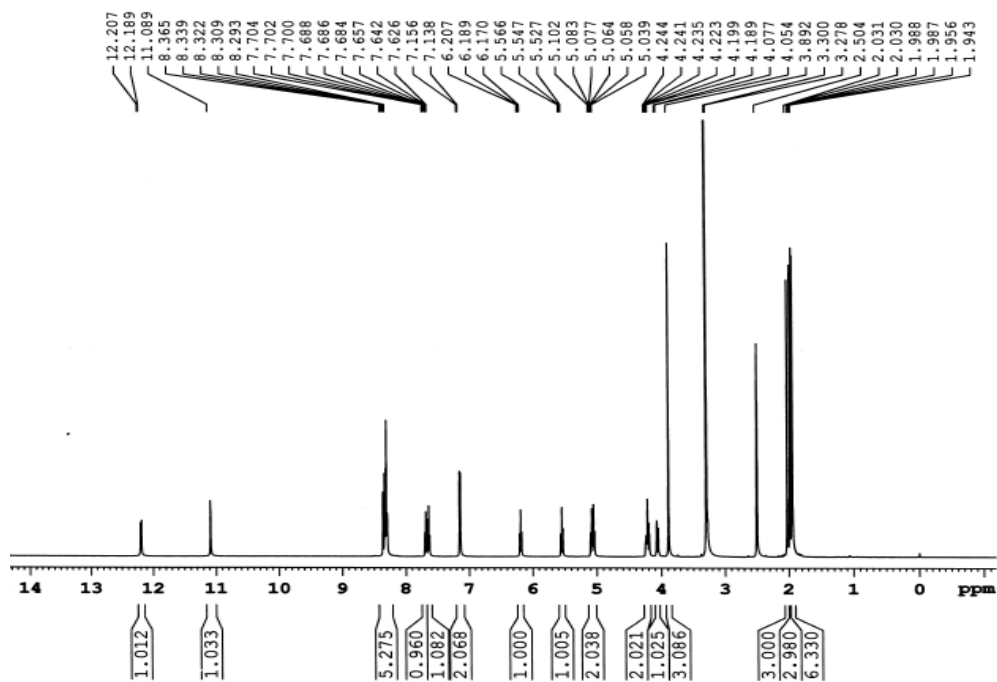

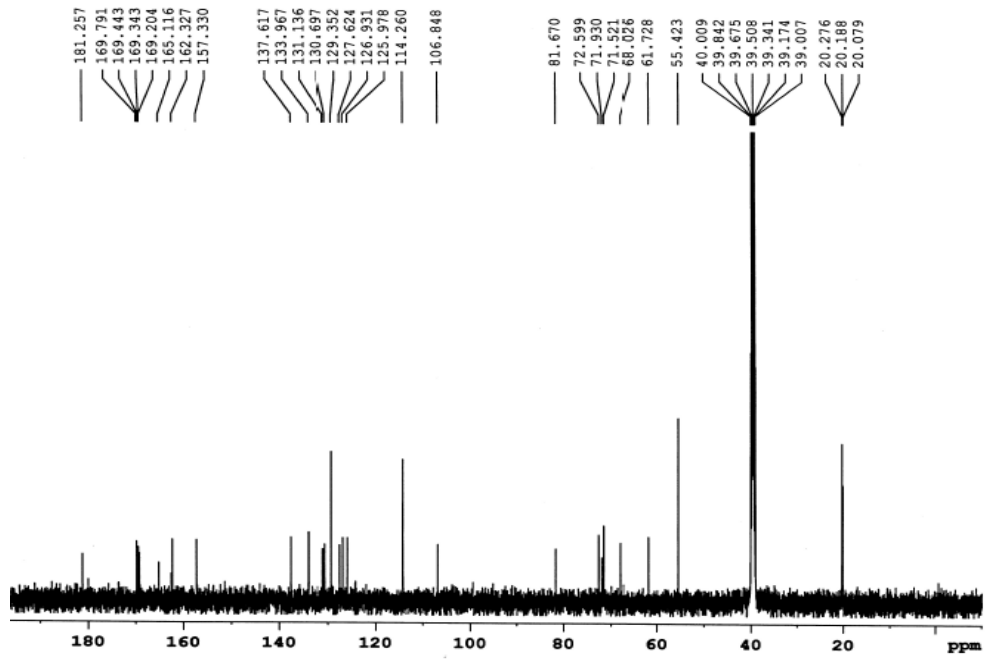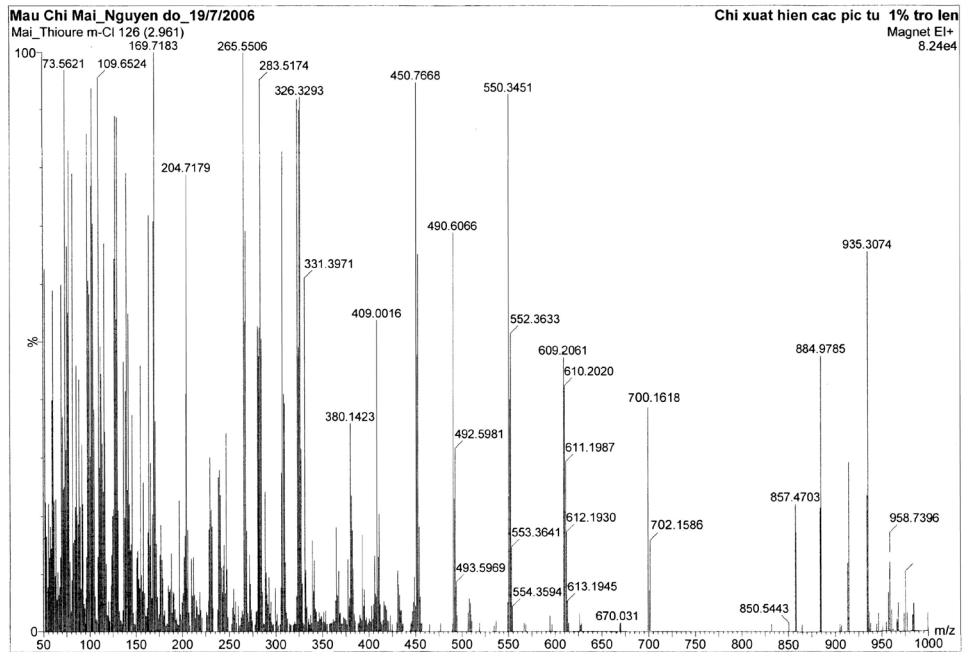

**NMR & MS Spectra of *N*-(2,3,4,6-tetra-*O*-acetyl- $\beta$ -D-glucopyranosyl)-*N*-[4-(2-chlorophenyl)-6-(4-methoxyphenyl)pyrimidine-2-yl]thiourea (7e)**

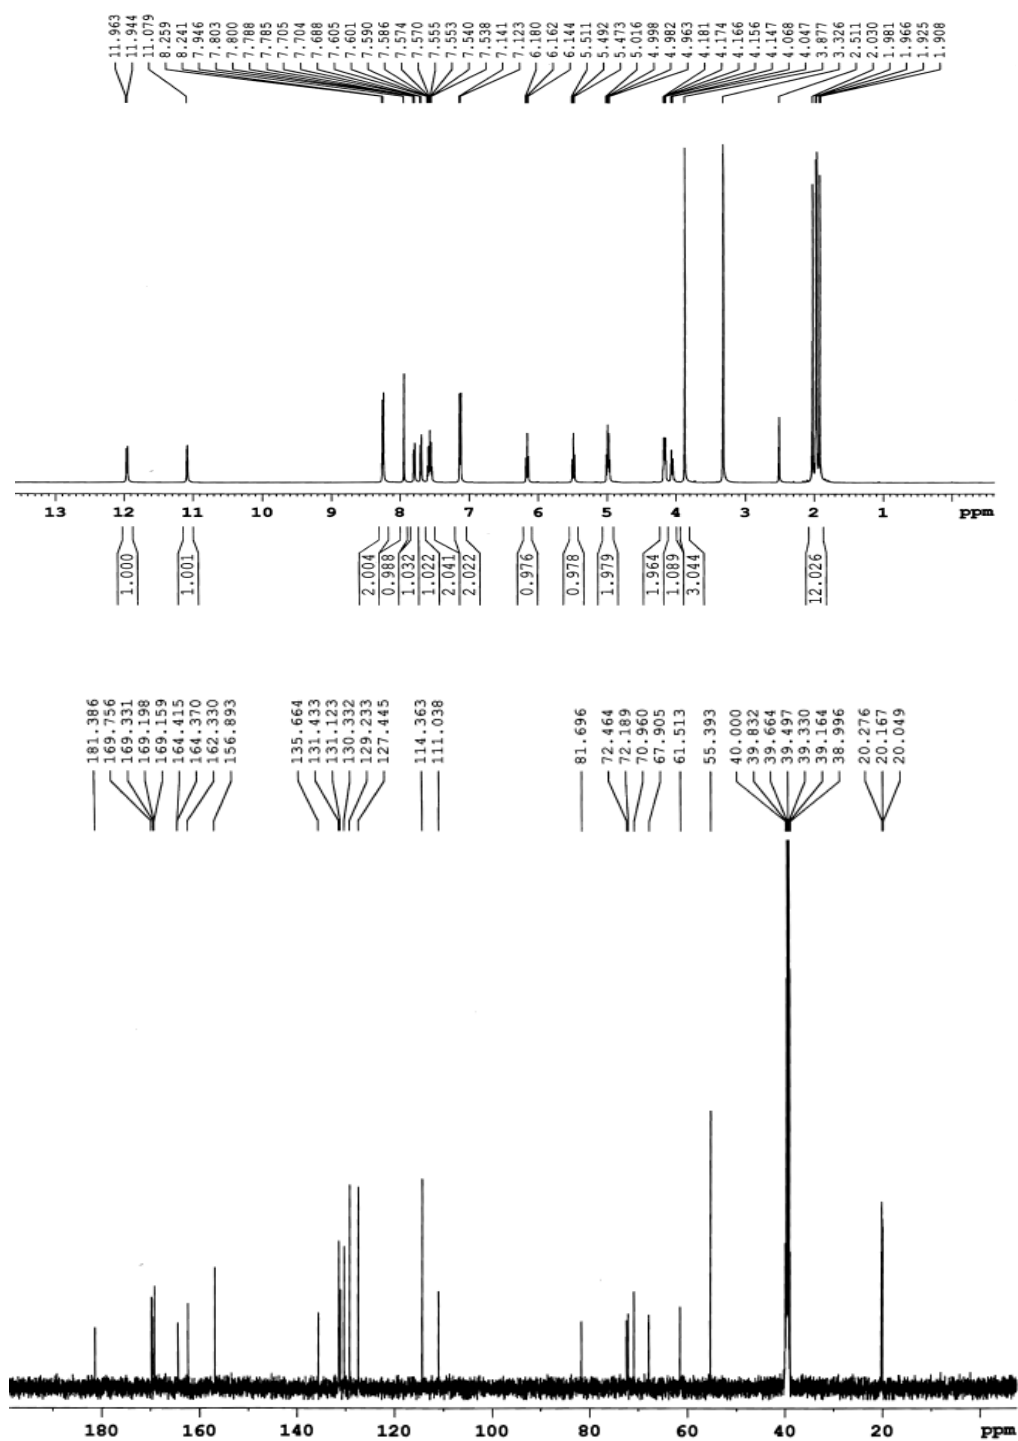

thiamcl2\_090915150330 #1 RT: 0.00 AV: 1 NL: 9.85E4  
T: ITMS + c ESI E Full ms [60.00-2000.00]

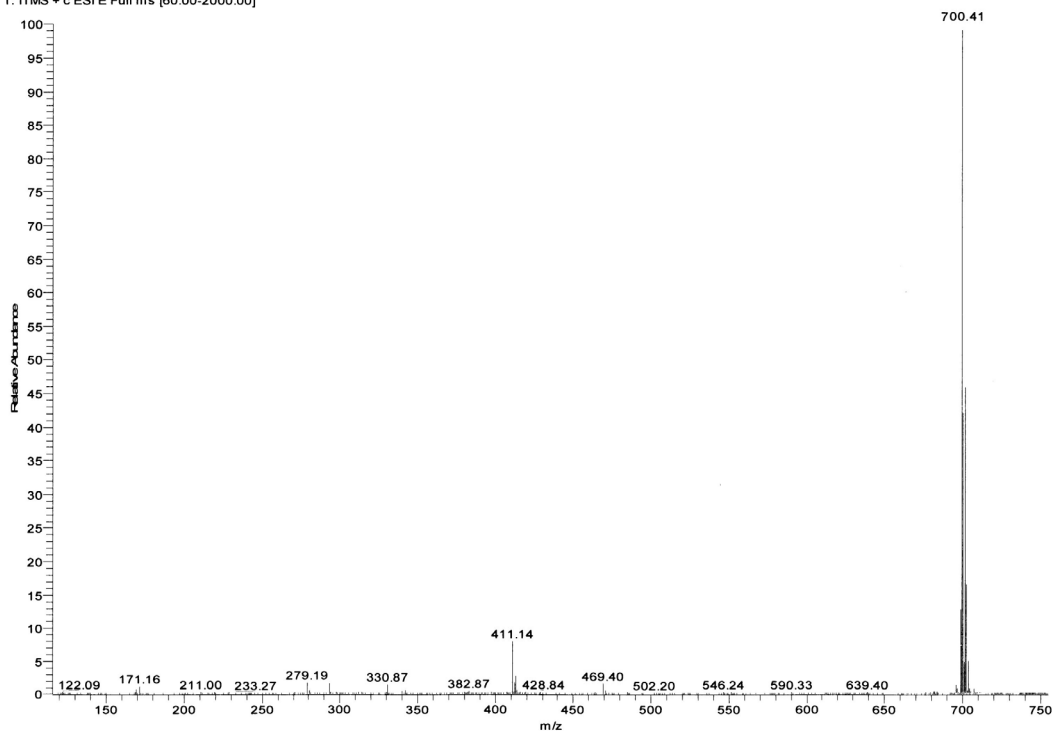

***NMR & MS Spectra of N-(2,3,4,6-tetra-O-acetyl-β-D-glucopyranosyl)-N-[4-(4-bromophenyl)-6-(4-methoxyphenyl)pyrimidine-2-yl]thiourea (7f)***

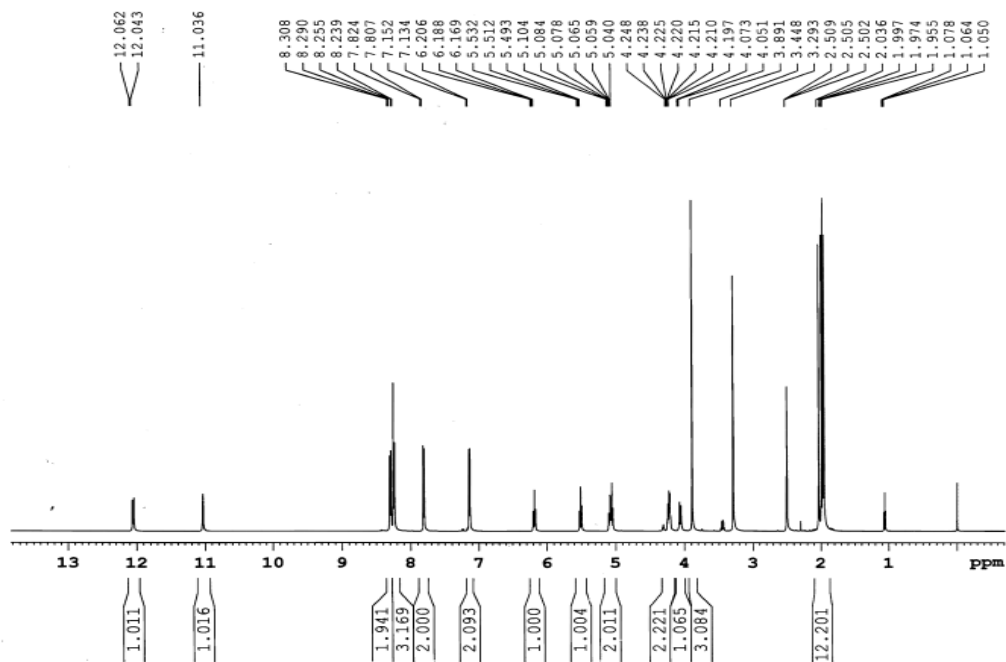

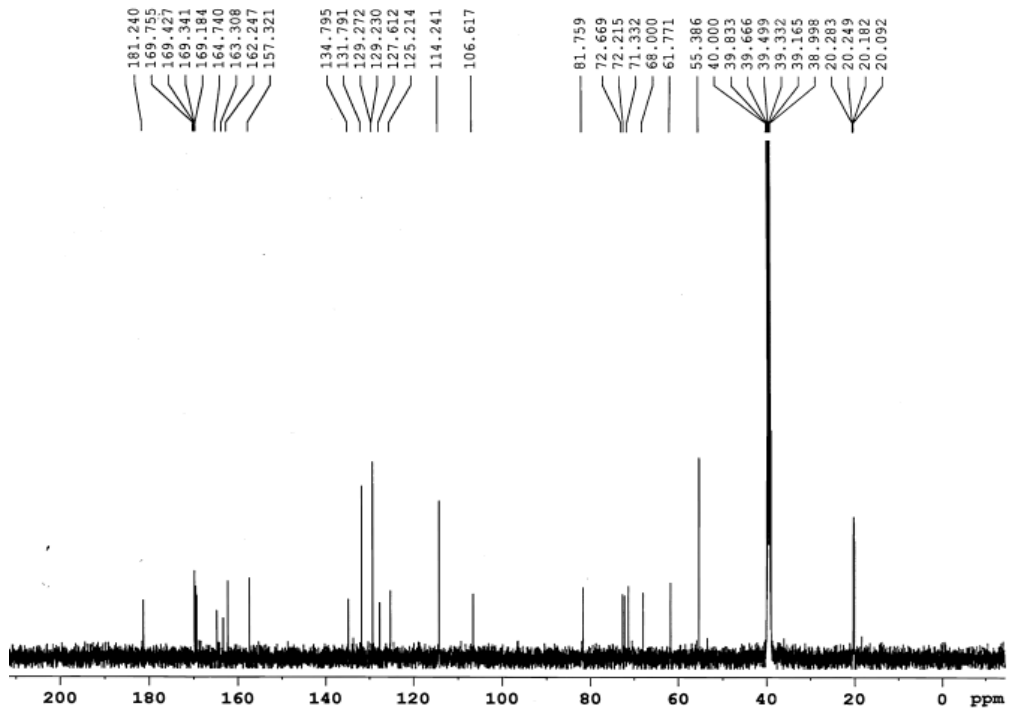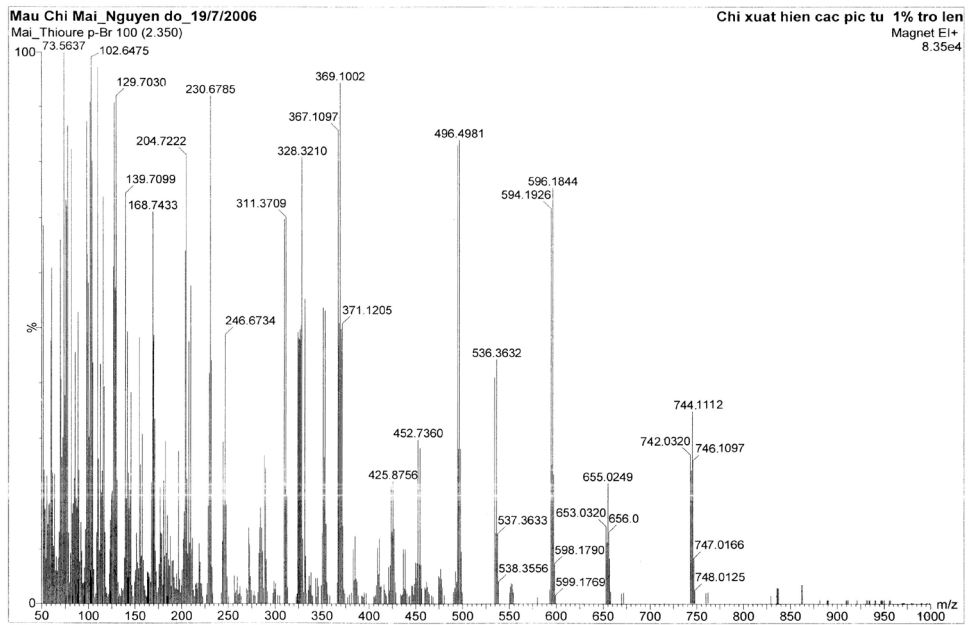



**NMR & MS Spectra of *N*-(2,3,4,6-tetra-*O*-acetyl- $\beta$ -D-glucopyranosyl)-*N*-[4-(4-methylphenyl)-6-(4-methoxyphenyl)pyrimidine-2-yl]thiourea (7g)**

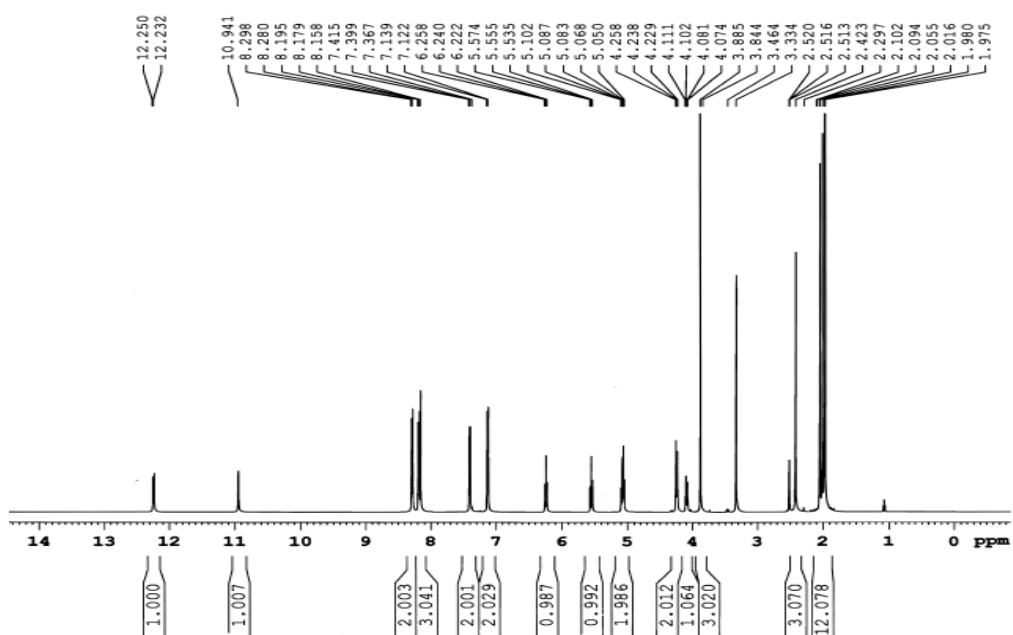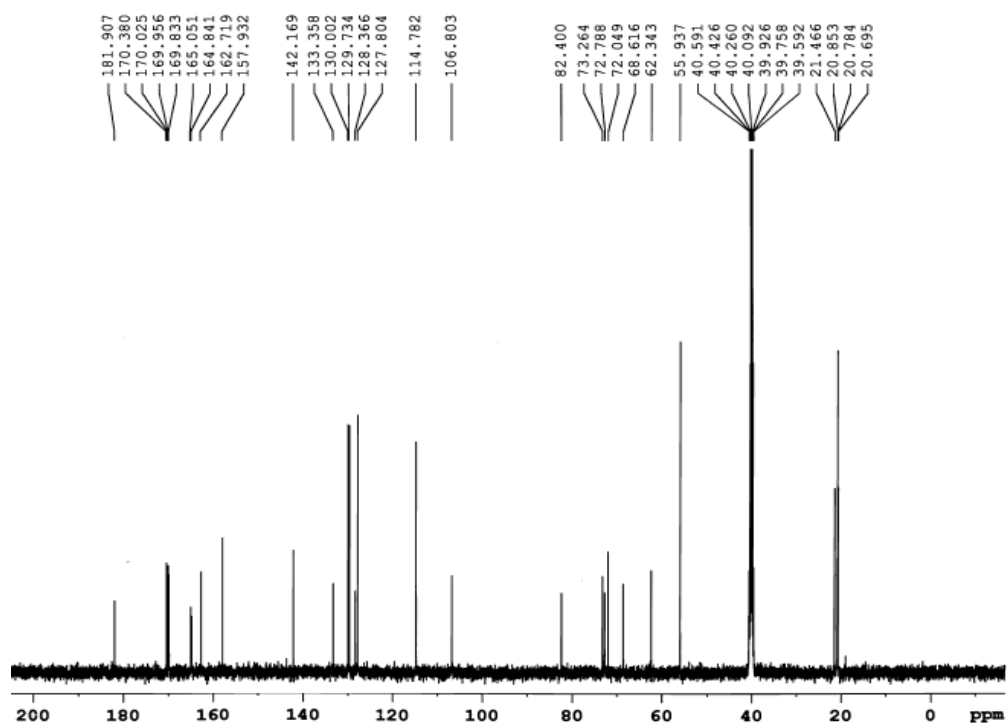

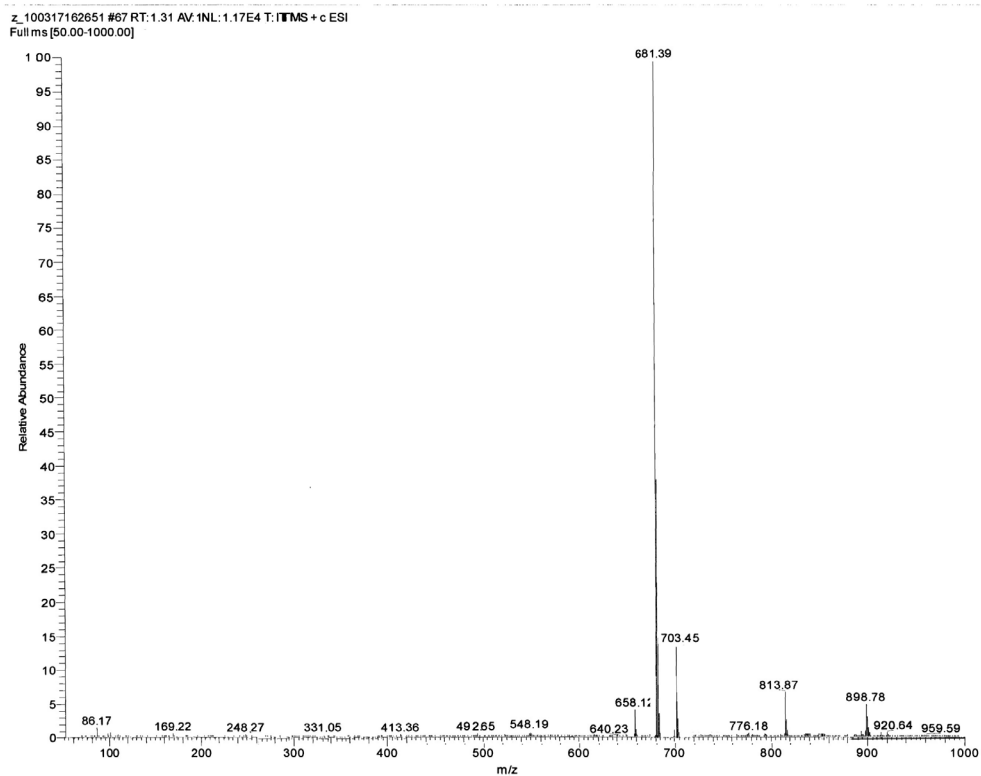

***NMR & MS Spectra of N-(2,3,4,6-tetra-O-acetyl-β-D-glucopyranosyl)-N-[4-(4-isopropylphenyl)-6-(4-methoxyphenyl)pyrimidine-2-yl]thiourea (7h)***

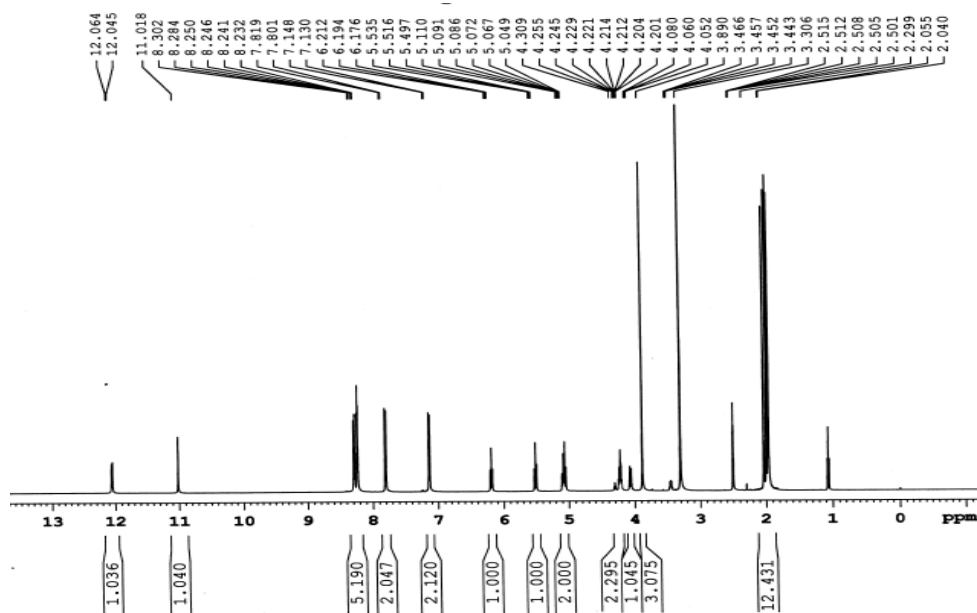

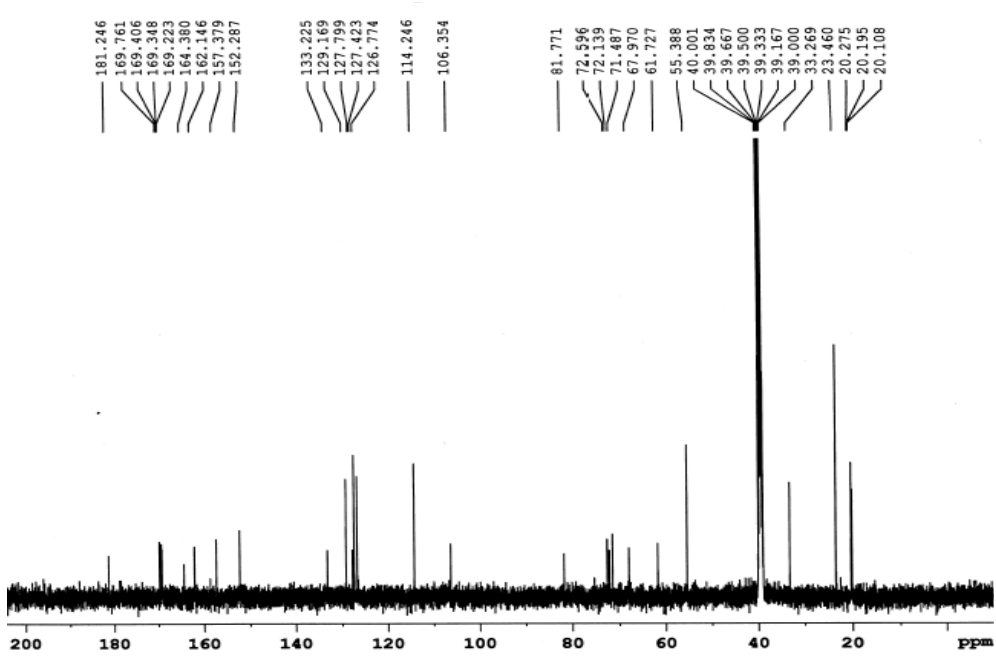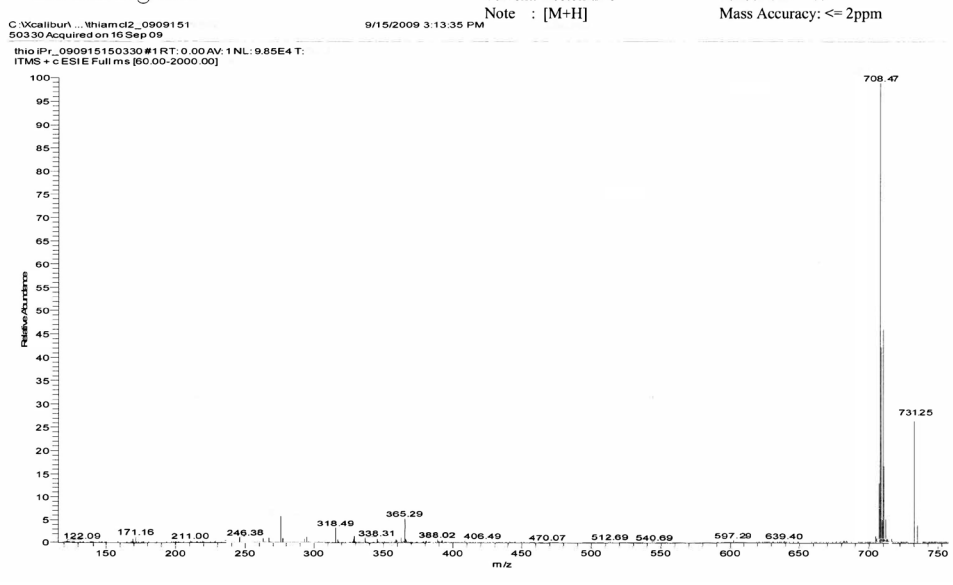

**NMR & MS Spectra of *N*-(2,3,4,6-tetra-*O*-acetyl- $\beta$ -D-glucopyranosyl)-*N*-[4-(4-methoxyphenyl)-6-(4-methoxyphenyl)pyrimidine-2-yl]thiourea (7i)**

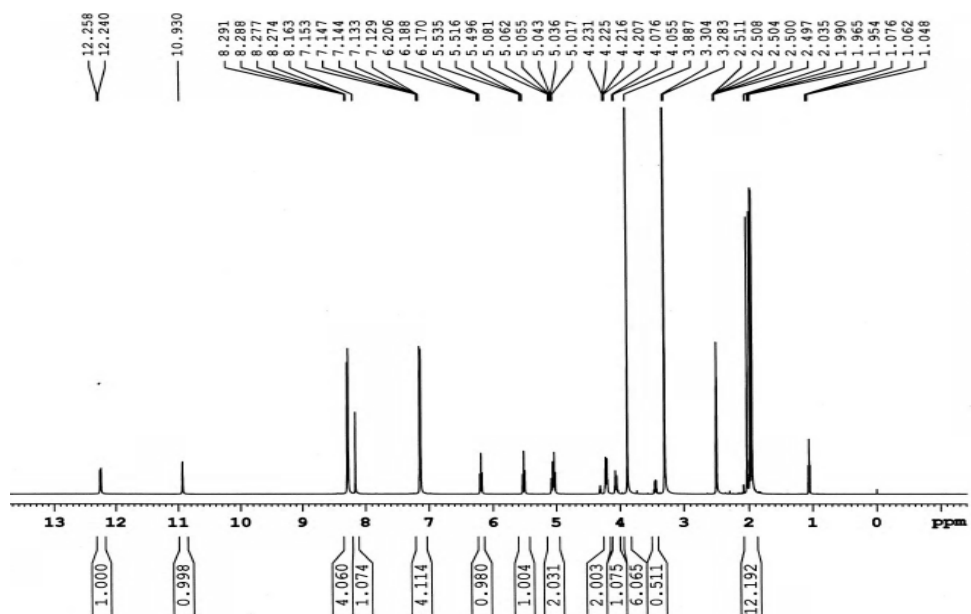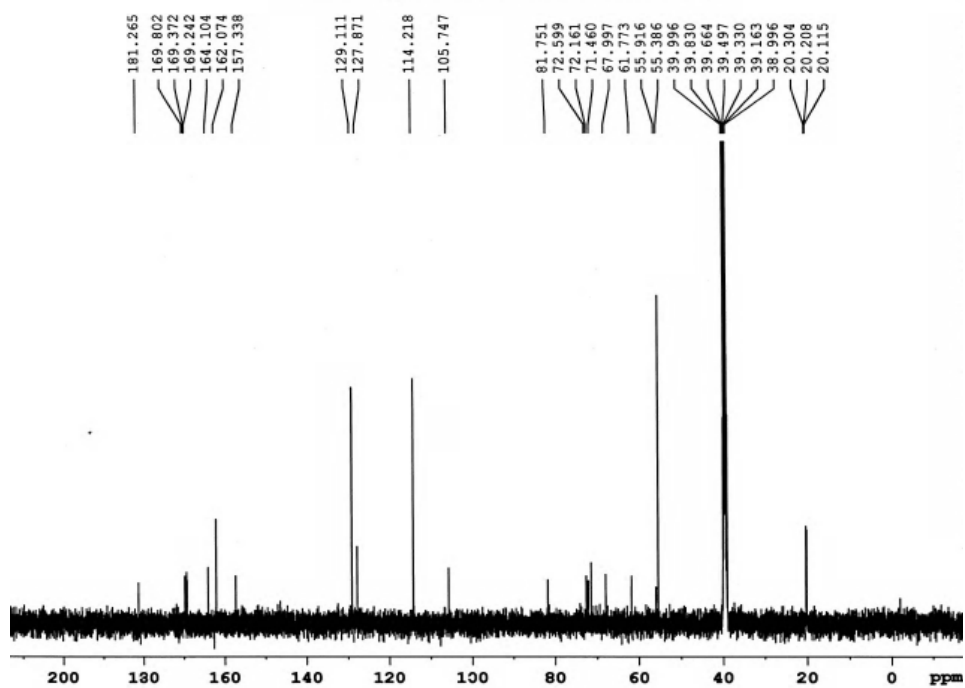

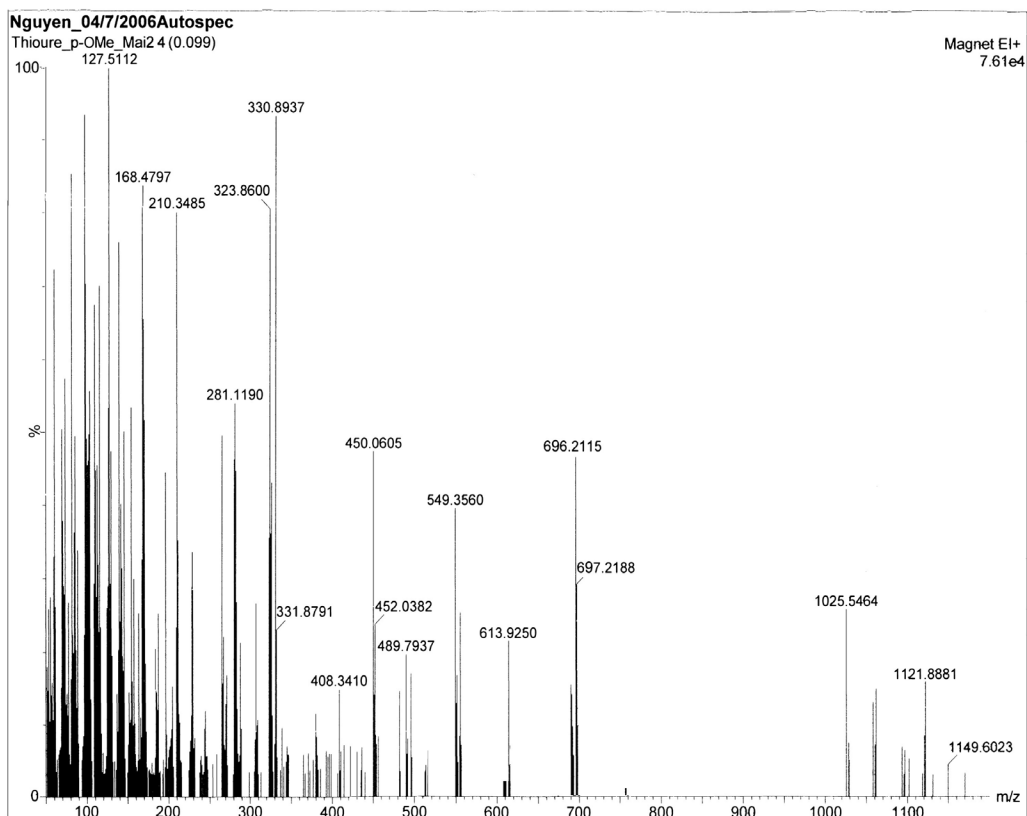

***NMR & MS Spectra of N-(2,3,4,6-tetra-O-acetyl- $\beta$ -D-glucopyranosyl)-N-[4-(3-methoxyphenyl)-6-(4-methoxyphenyl)pyrimidine-2-yl]thiourea (7j)***

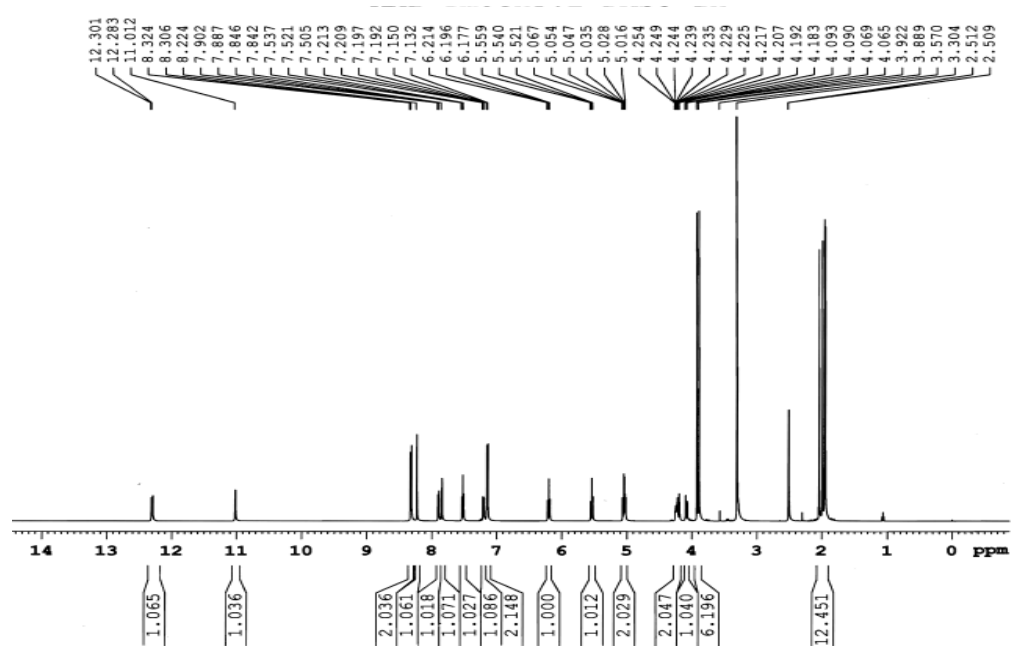

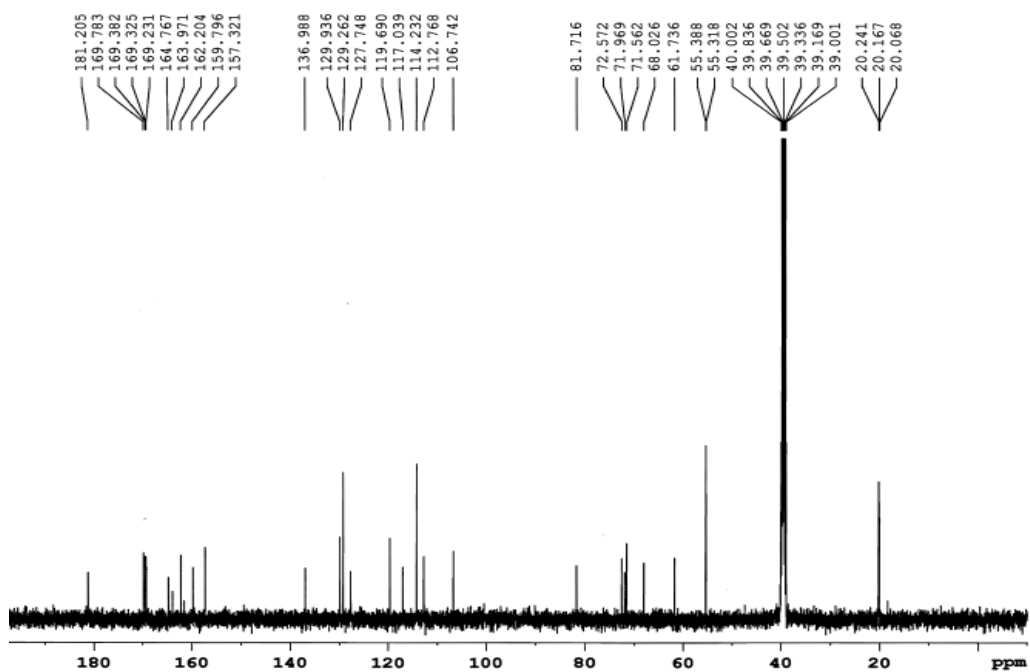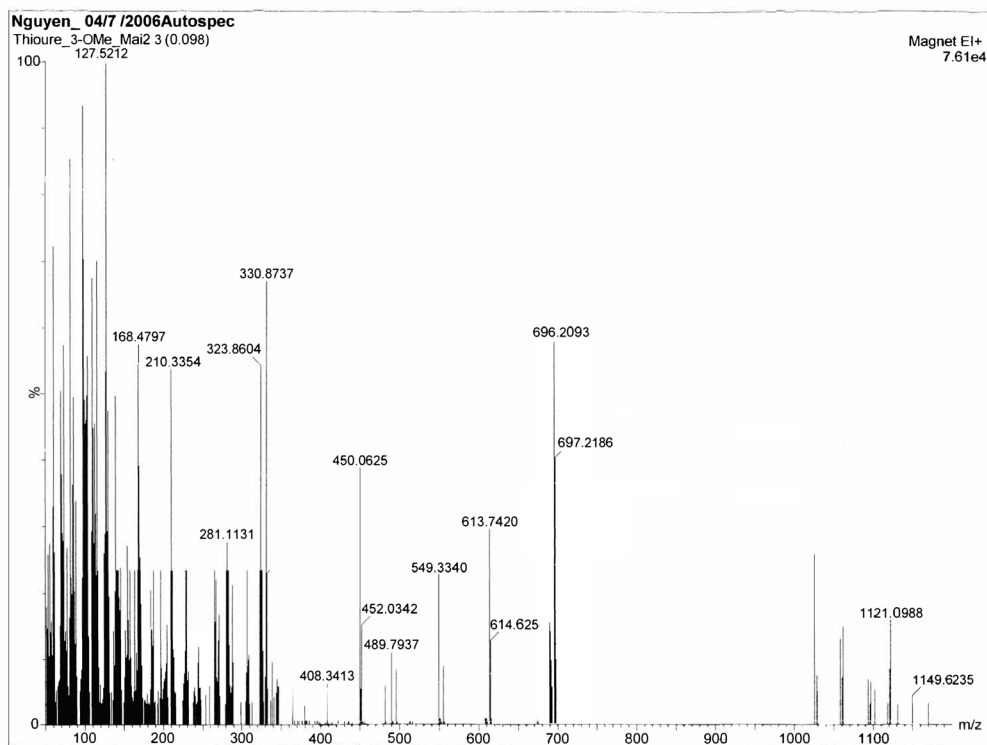

**NMR & MS Spectra of *N*-(2,3,4,6-tetra-*O*-acetyl- $\beta$ -D-glucopyranosyl)-*N*-[4-(4-dimethylaminophenyl)-6-(4-methoxyphenyl)pyrimidine-2-yl]thiourea (7k)**

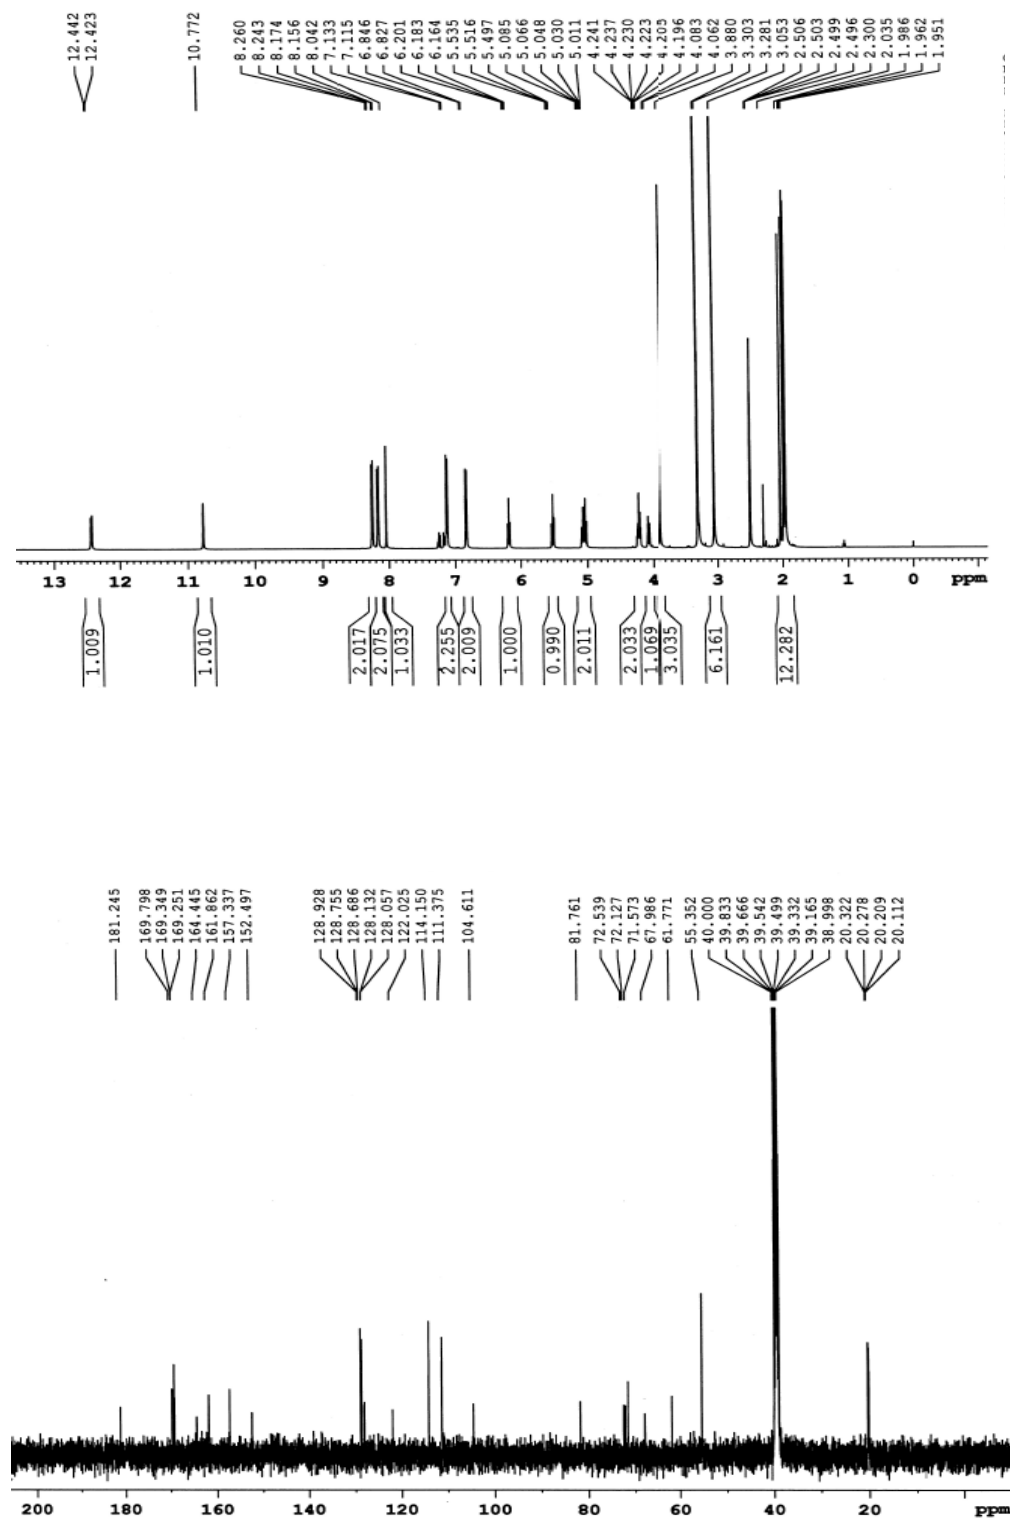

thia-OH\_090915150330 #5 RT: 0.12 AV: 1 NL: 3.38E5  
T: ITMS + c ESI E Full ms [110.00-2000.00]

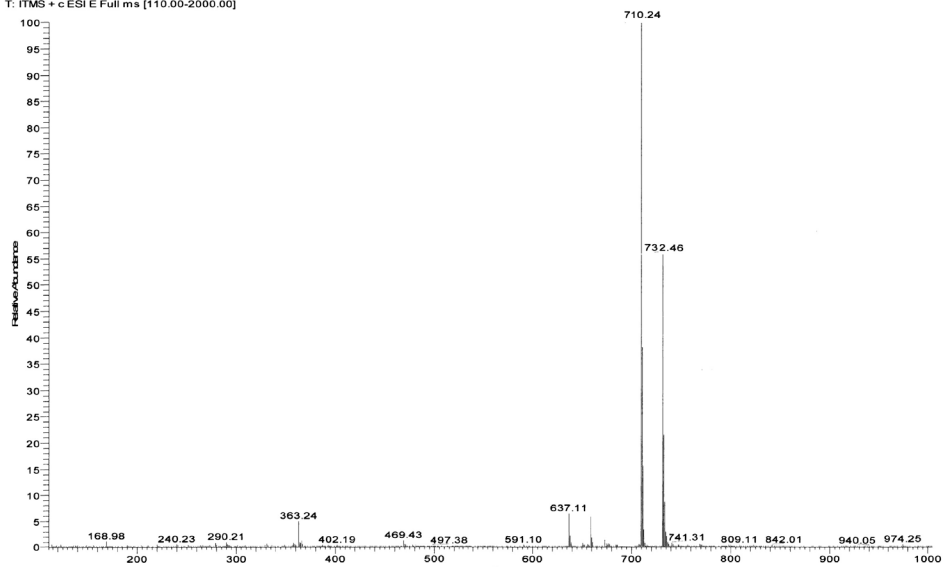

Supplement: d4nj00209a1.pdf [file d4nj00209a1.pdf]
